# Supplementary material for: H-IPSE Is a Pathogen-Secreted Host Nucleus-Infiltrating Protein (Infiltrin) Expressed Exclusively by the Schistosoma haematobium Egg Stage
Source: PubMed Central journal article supplement (PMC5695104; doi:10.1128/iai.00301-17), 2017-11-17
Supplement: IAI.00301-17_zii999092214s1.pdf [file IAI.00301-17_zii999092214s1.pdf]

**SUPPLEMENTARY INFORMATION TO**

Manuscript IAI#00301-17

**H-IPSE is a pathogen-secreted host nucleus infiltrating protein (infiltrin)  
expressed exclusively by the *Schistosoma haematobium* egg stage**

Luke F. Pennington<sup>a§</sup>, Abdulaziz Alouffi<sup>b§</sup>, Evaristus C. Mbanefo<sup>c</sup>, Debalina Ray<sup>d</sup>, David  
M. Heery<sup>e</sup>, Ted Jardetzky<sup>a</sup>, Michael H. Hsieh<sup>c,f</sup> and F. H. Falcone<sup>b</sup>

<sup>a</sup>Stanford University School of Medicine, Stanford, CA, USA;

<sup>b</sup>School of Pharmacy, Division of Molecular Therapeutics and Formulation, University of Nottingham, Nottingham, UK;

<sup>c</sup>Biomedical Research Institute, Rockville, MD, USA

<sup>d</sup>Department of Pathology, University of California, San Francisco, CA, USA

<sup>e</sup>School of Pharmacy, Division of Biomolecular Science and Medicinal Chemistry, University of Nottingham, Nottingham, UK

<sup>f</sup>Department of Urology, The George Washington University, Washington, D.C., USA

<sup>§</sup> Equal contributors

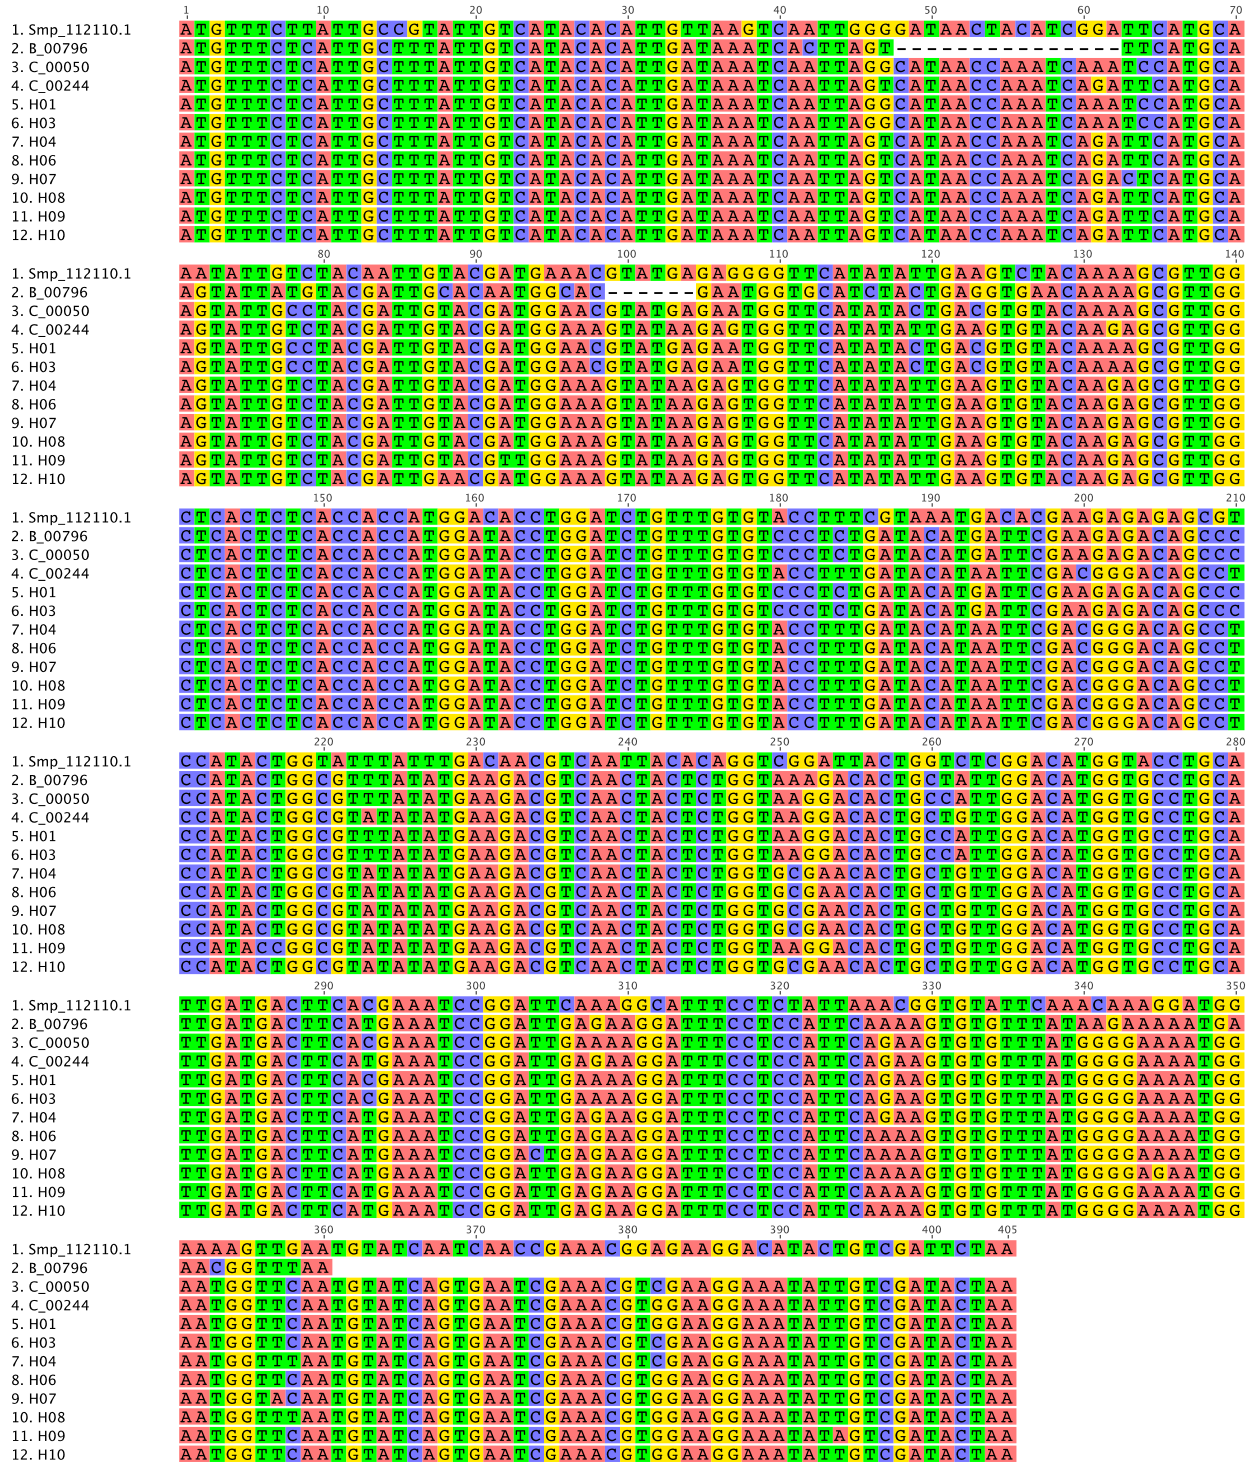

**Figure S1:** A Geneious global alignment with free end gaps and default alignment parameters (65% similarity (5.0/-4.0) cost matrix, 12 gap open penalty, 3 gap extension penalty, 2 refinement iterations) was performed using indicated sequences (Geneious v7.1.4).

|              | Smp_112110.1 | B_00796 | C_00050 | C_00244 | H01  | H03  | H04  | H06  | H07  | H08  | H09  | H10  |
|--------------|--------------|---------|---------|---------|------|------|------|------|------|------|------|------|
| Smp_112110.1 |              | 73.9    | 80.7    | 80.7    | 80.7 | 80.7 | 81   | 81.2 | 80.5 | 81.5 | 80.2 | 81   |
| B_00796      | 73.9         |         | 87.5    | 85.8    | 87.5 | 87.5 | 85.3 | 85.3 | 84.4 | 85.3 | 85.6 | 85.3 |
| C_00050      | 80.7         | 87.5    |         | 94.6    | 99.8 | 100  | 93.8 | 93.6 | 92.8 | 93.1 | 93.6 | 93.3 |
| C_00244      | 80.7         | 85.8    | 94.6    |         | 94.8 | 94.6 | 98.8 | 99   | 98.3 | 98.5 | 99   | 98.8 |
| H01          | 80.7         | 87.5    | 99.8    | 94.8    |      | 99.8 | 93.6 | 93.8 | 93.1 | 93.3 | 93.8 | 93.6 |
| H03          | 80.7         | 87.5    | 100     | 94.6    | 99.8 |      | 93.8 | 93.6 | 92.8 | 93.1 | 93.6 | 93.3 |
| H04          | 81           | 85.3    | 93.8    | 98.8    | 93.6 | 93.8 |      | 99.3 | 98.5 | 99.3 | 97.8 | 99   |
| H06          | 81.2         | 85.3    | 93.6    | 99      | 93.8 | 93.6 | 99.3 |      | 99.3 | 99.5 | 98.5 | 99.8 |
| H07          | 80.5         | 84.4    | 92.8    | 98.3    | 93.1 | 92.8 | 98.5 | 99.3 |      | 98.8 | 97.8 | 99   |
| H08          | 81.5         | 85.3    | 93.1    | 98.5    | 93.3 | 93.1 | 99.3 | 99.5 | 98.8 |      | 98   | 99.3 |
| H09          | 80.2         | 85.6    | 93.6    | 99      | 93.8 | 93.6 | 97.8 | 98.5 | 97.8 | 98   |      | 98.3 |
| H10          | 81           | 85.3    | 93.3    | 98.8    | 93.6 | 93.3 | 99   | 99.8 | 99   | 99.3 | 98.3 |      |

**Figure S2:** A matrix showing the relative nucleotide identity of the indicated sequences.

>Smp\_112110.1

```
ATTGCCGTATTGTCATACACATTGTTAAGTCAATTGGGGATAACTACATCGGATTCATGCAAATATTGTCTACAATTG
TACGATGAAACGTATGAGAGGGGTTTCATATATTGAAGTCTACAAAAGCGTTGGCTCACTCTCACCACCATGGACACCT
GGATCTGTTTGTGTACCTTTTCGTAATGACACGAAGAGAGAGCGTCCATACTGGTATTTATTTGACAACGTCAATTAC
ACAGGTCGGATTACTGGTCTCGGACATGGTACCTGCATTGATGACTTCACGAAATCCGGATTCAAAGGCATTTCTCT
ATTAACGGTGTATTCAAACAAAGGATGGAAAAGTTGAATGTATCAATCAACCGAAACGGAGAAGGACATACTGTCTGA
TTCTAA
```

>C\_00244

```
ATTGCTTTTATTGTCATACACATTGATAAATCAATTAGTCATAACCAAATCAGATTCATGCAAGTATTGTCTACGATTG
TACGATGGAAGTATAAGAGTGGTTTCATATATTGAAGTGTACAAGAGCGTTGGCTCACTCTCACCACCATGGATACCT
GGATCTGTTTGTGTACCTTTGATACATAATTCGACGGGACAGCCTCCATACTGGCGTATATATGAAGACGTCAACTAC
TCTGGTAAGGACACTGCTGTTGGACATGGTGCCTGCATTGATGACTTCATGAAATCCGGATTGAGAAGGATTTCTCTCC
ATTCAGAAGTGTGTTTATGGGGAAAATGGAATGGTTCAATGTATCAGTGAATCGAAACGTGGAAGGAAATATTGTCTGA
TACTAA
```

>C\_00050

```
ATTGCTTTTATTGTCATACACATTGATAAATCAATTAGGCATAACCAAATCAAATCCATGCAAGTATTGCCTACGATTG
TACGATGGAACGTATGAGAATGGTTTCATATACTGACGTGTACAAAAGCGTTGGCTCACTCTCACCACCATGGATACCT
GGATCTGTTTGTGTCCCTCTGATACATGATTCGAAGAGACAGCCCCATACTGGCGTTTATATGAAGACGTCAACTAC
TCTGGTAAGGACACTGCCATTGGACATGGTGCCTGCATTGATGACTTCACGAAATCCGGATTGAAAAGGATTTCTCTCC
ATTCAGAAGTGTGTTTATGGGGAAAATGGAATGGTTCAATGTATCAGTGAATCGAAACGTGGAAGGAAATATTGTCTGA
TACTAA
```

>B\_00796

```
ATTGCTTTTATTGTCATACACATTGATAAATCACTTAGTTTTATGCAAGTATTATGTACGATTGCACAATGGCACGAAT
GGTGCATCTACTGAGGTGAACAAAAGCGTTGGCTCACTCTCACCACCATGGATACCTGGATCTGTTTGTGTCCCTCTG
ATACATGATTCGAAGAGACAGCCCCATACTGGCGTTTATATGAAGACGTCAACTACTCTGGTAAAGACACTGCTATT
GGACATGGTGCCTGCATTGATGACTTCATGAAATCCGGATTGAGAAGGATTTCTCTCATTCAAAGTGTGTTTATAAG
AAAATGAAACGGTTTTAA
```

>H1

```
ATTGCTTTTATTGTCATACACATTGATAAATCAATTAGGCATAACCAAATCAAATCCATGCAAGTATTGCCTACGATTG
TACGATGGAACGTATGAGAATGGTTTCATATACTGACGTGTACAAAAGCGTTGGCTCACTCTCACCACCATGGATACCT
GGATCTGTTTGTGTCCCTCTGATACATGATTCGAAGAGACAGCCCCATACTGGCGTTTATATGAAGACGTCAACTAC
TCTGGTAAGGACACTGCCATTGGACATGGTGCCTGCATTGATGACTTCACGAAATCCGGATTGAAAAGGATTTCTCTCC
ATTCAGAAGTGTGTTTATGGGGAAAATGGAATGGTTCAATGTATCAGTGAATCGAAACGTGGAAGGAAATATTGTCTGA
TACTAA
```

>H3

ATTGCTTTATTGTCATACACATTGATAAATCAATTAGGCATAACCAAATCAAATCCATGCAAGTATTGCCTACGATTG  
TACGATGGAACGTATGAGAATGGTTCATATACTGACGTGTACAAAAGCGTTGGCTCACTCTCACCACCATGGATACCT  
GGATCTGTTTGTGTCCCTCTGATACATGATTGGAAGAGACAGCCCCATACTGGCGTTTATATGAAGACGTCAACTAC  
TCTGGTAAGGACACTGCCATTGGACATGGTGCCTGCATTGATGACTTCACGAAATCCGGATTGAAAAGGATTTCTCTCC  
ATTCAGAAGTGTGTTTATGGGGAAAATGGAATGGTTC AATGTATCAGTGAATCGAAACGTGCAAGGAAATATTGTCTCGA  
TACTAA

>H4

ATTGCTTTATTGTCATACACATTGATAAATCAATTAGTCATAACCAAATCAGATTTCATGCAAGTATTGTCTACGATTG  
TACGATGGAAGTATAAGAGTGGTTCATATATTGAAGTGTACAAGAGCGTTGGCTCACTCTCACCACCATGGATACCT  
GGATCTGTTTGTGTACCTTTGATACATAAATTCGACGGGACAGCCTCCATACTGGCGTATATATGAAGACGTCAACTAC  
TCTGGTGCGAACACTGCTGTTGGACATGGTGCCTGCATTGATGACTTCATGAAATCCGGATTGAGAAGGATTTCTCTCC  
ATTCAGAAGTGTGTTTATGGGGAAAATGGAATGGTTC AATGTATCAGTGAATCGAAACGTGCAAGGAAATATTGTCTCGA  
TACTAA

>H6

ATTGCTTTATTGTCATACACATTGATAAATCAATTAGTCATAACCAAATCAGATTTCATGCAAGTATTGTCTACGATTG  
TACGATGGAAGTATAAGAGTGGTTCATATATTGAAGTGTACAAGAGCGTTGGCTCACTCTCACCACCATGGATACCT  
GGATCTGTTTGTGTACCTTTGATACATAAATTCGACGGGACAGCCTCCATACTGGCGTATATATGAAGACGTCAACTAC  
TCTGGTGCGAACACTGCTGTTGGACATGGTGCCTGCATTGATGACTTCATGAAATCCGGATTGAGAAGGATTTCTCTCC  
ATTCAAAAGTGTGTTTATGGGGAAAATGGAATGGTTC AATGTATCAGTGAATCGAAACGTGGAAGGAAATATTGTCTCGA  
TACTAA

>H7

ATTGCTTTATTGTCATACACATTGATAAATCAATTAGTCATAACCAAATCAGACTCATGCAAGTATTGTCTACGATTG  
TACGATGGAAGTATAAGAGTGGTTCATATATTGAAGTGTACAAGAGCGTTGGCTCACTCTCACCACCATGGATACCT  
GGATCTGTTTGTGTACCTTTGATACATAAATTCGACGGGACAGCCTCCATACTGGCGTATATATGAAGACGTCAACTAC  
TCTGGTGCGAACACTGCTGTTGGACATGGTGCCTGCATTGATGACTTCATGAAATCCGGACTGAGAAGGATTTCTCTCC  
ATTCAAAAGTGTGTTTATGGGGAAAATGGAATGGTTC AATGTATCAGTGAATCGAAACGTGGAAGGAAATATTGTCTCGA  
TACTAA

>H8

ATTGCTTTATTGTCATACACATTGATAAATCAATTAGTCATAACCAAATCAGATTTCATGCAAGTATTGTCTACGATTG  
TACGATGGAAGTATAAGAGTGGTTCATATATTGAAGTGTACAAGAGCGTTGGCTCACTCTCACCACCATGGATACCT  
GGATCTGTTTGTGTACCTTTGATACATAAATTCGACGGGACAGCCTCCATACTGGCGTATATATGAAGACGTCAACTAC  
TCTGGTGCGAACACTGCTGTTGGACATGGTGCCTGCATTGATGACTTCATGAAATCCGGATTGAGAAGGATTTCTCTCC  
ATTCAAAAGTGTGTTTATGGGGAGAATGGAATGGTTC AATGTATCAGTGAATCGAAACGTGGAAGGAAATATTGTCTCGA  
TACTAA

>H9

ATTGCTTTATTGTCATACACATTGATAAATCAATTAGTCATAACCAAATCAGATTTCATGCAAGTATTGTCTACGATTG  
TACGTTGGAAAGTATAAGAGTGGTTCATATATTGAAGTGTACAAGAGCGTTGGCTCACTCTCACCACCATGGATACCT  
GGATCTGTTTGTGTACCTTTGATACATAAATTCGACGGGACAGCCTCCATACCGGCGTATATATGAAGACGTCAACTAC  
TCTGGTAAGGACACTGCTGTTGGACATGGTGCCTGCATTGATGACTTCATGAAATCCGGATTGAGAAGGATTTCTCTCC  
ATTCAAAAGTGTGTTTATGGGGAAAATGGAATGGTTC AATGTATCAGTGAATCGAAACGTGGAAGGAAATATAGTCTCGA  
TACTAA

>H10

ATTGCTTTATTGTCATACACATTGATAAATCAATTAGTCATAACCAAATCAGATTTCATGCAAGTATTGTCTACGATTG  
AACGATGGAAGTATAAGAGTGGTTCATATATTGAAGTGTACAAGAGCGTTGGCTCACTCTCACCACCATGGATACCT  
GGATCTGTTTGTGTACCTTTGATACATAAATTCGACGGGACAGCCTCCATACTGGCGTATATATGAAGACGTCAACTAC  
TCTGGTGCGAACACTGCTGTTGGACATGGTGCCTGCATTGATGACTTCATGAAATCCGGATTGAGAAGGATTTCTCTCC  
ATTCAAAAGTGTGTTTATGGGGAAAATGGAATGGTTC AATGTATCAGTGAATCGAAACGTGGAAGGAAATATTGTCTCGA  
TACTAA

**Figure S3:** FASTA-formatted sequences used for alignments

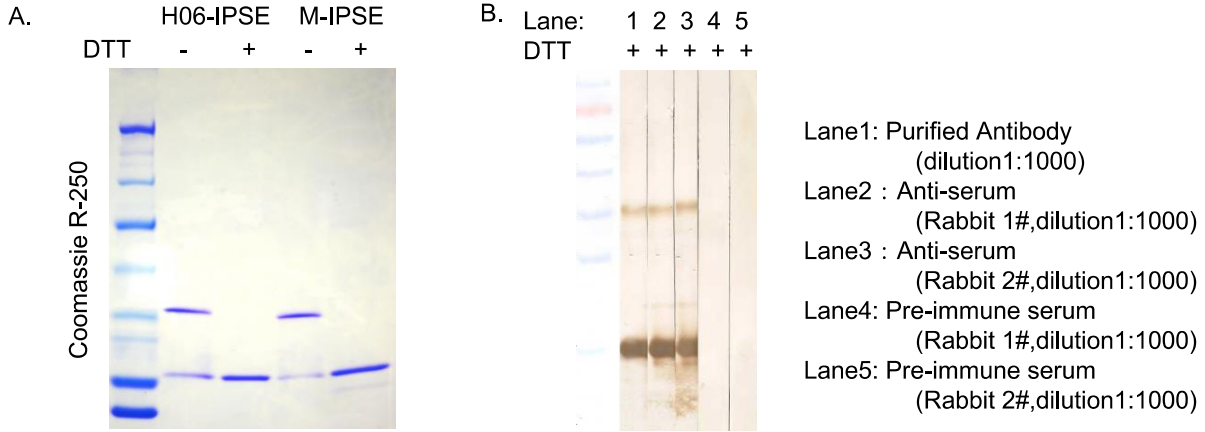

**Figure S4:** Generation of polyclonal anti-H06-IPSE antibodies: A.) 4-20% gradient SDS-PAGE electrophoresis of refolded H06-IPSE and M-IPSE stained with Coomassie R250. H06-IPSE protein was supplied as immunogen to ProMab Biotechnologies for the generation of anti-IPSE polyclonal rabbit antibodies. B.) A western blot H06-IPSE under reducing conditions with anti-serum and purified antibody from immunized rabbits before and after IPSE injection.

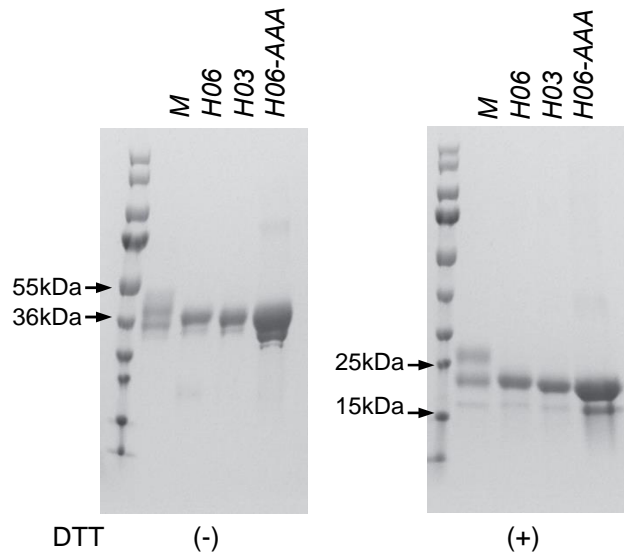

**Figure S5:** Mammalian derived IPSE: 4-20% gradient SDS-PAGE electrophoresis of IPSE variants expressed in HEK-6E cells and purified with Ni-NTA or TALON affinity resins stained with Coomassie R250. Proteins exhibited the expected homodimeric (DTT negative) and monomeric (DTT positive) molecular weights corresponding to differential glycosylation at the multiple potential N-linked glycosylation sites.

**Table T1**

| Mutant/wt                                                                                                                                          | Purpose<br>Sequence (5'→3')                                                                                                                                    |
|----------------------------------------------------------------------------------------------------------------------------------------------------|----------------------------------------------------------------------------------------------------------------------------------------------------------------|
|                                                                                                                                                    | <i>Construction pTT5 expression constructs</i>                                                                                                                 |
| M-IPSE for                                                                                                                                         | GGCGGAGAGAACCTGTATTTTCAGGGCGGATCCGAC<br>AGCTGCAAGTACTGCCTGCAG                                                                                                  |
| M-IPSE rev                                                                                                                                         | AGCGGCCGCGGTACCAAGCTAGTCATTACTIONAGAAC<br>GGCAGTAGGTCTCCGCCGCTTGG                                                                                              |
| H03-IPSE for                                                                                                                                       | GGCGGAGAGAACCTGTATTTTCAGGGCGGATCCAAC<br>CCCTGCAAGTACTGCCTGCG                                                                                                   |
| H03-IPSE rev                                                                                                                                       | GCGGCCGCGGTACCAAGCTAGTCATTACTIONAGTACCG<br>GCAGTACTTTCTCCGCCGCTTGC                                                                                             |
| H06-IPSE for                                                                                                                                       | GGCGGAGAGAACCTGTATTTTCAGGGCGGATCCAAG<br>AGCGACAGCTGCAAGTACTG                                                                                                   |
| H06-IPSE rev                                                                                                                                       | AGCGGCCGCGGTACCAAGCTAGTCATTACTIONAGTACC<br>GGCAGTACTTTCTGCCCGCTTGC                                                                                             |
| VEGF-SS-8xHIS-TEV for<br>VEGF-SS-8xHIS-TEV rev                                                                                                     | CCAGGTCCAAGTTTAAACGGATCTCTAGCG<br>GGATCCGCCCTGAAAATACAGGTTCTCTCCGCC                                                                                            |
| H06-SK <b>AA</b> AKY for                                                                                                                           | GAGAGCAAGGCCGCTGCCAAGTACTGCCGGTACTAG<br>TAATGACTAGC                                                                                                            |
| H06-SK <b>AA</b> AKY rev                                                                                                                           | GCAGTACTTGGCAGCGGCCTTGCTCTCGCTGATGCA<br>CTGCACCATGCC                                                                                                           |
|                                                                                                                                                    | <i>Cloning IPSE transcripts</i>                                                                                                                                |
| H-IPSE for<br>H-IPSE rev<br>H-IPSE RACE for.1<br>H-IPSE RACE (nested) for.2<br>Anchor Insert 3' RACE rev.1<br>Anchor Insert 3' RACE (nested) rev.2 | ATGTTTCTCATTGCTTTATTGTCATACAC<br>ACACAAACAGATCCAGGTATCC<br>CGATGTTTCTCATTGCTTTATTGTC<br>GTTTCTCATTGCTTTATTGTCATAC<br>GTCATCGGCTTAGCATTG<br>CTTAGCATTGATGTCTCGC |
|                                                                                                                                                    | <i>Tetra-EGFP- NLS mutagenic oligonucleotides</i>                                                                                                              |
| PKKKRKV-For (SV40 pos control)<br>PKKKRKV -Rev                                                                                                     | * <u>GATCT</u> CCGAAGAAGAAGAGGAAGGTAA<br>* <u>GATCT</u> TACCTTCCTCTTCTTCTCGGA                                                                                  |
| SKRGRKY-For (H06-IPSE WT)<br>SKRGRKY-Rev                                                                                                           | * <u>GATCT</u> AGCAAGAGGGGAAGGAAGTACA<br>* <u>GATCT</u> GTACTIONCTTCCCCTCTTGCTA                                                                                |
| SKR <b>RR</b> KY-For (H03-IPSE WT)<br>SKR <b>RR</b> KY-Rev                                                                                         | * <u>GATCT</u> AGCAAGAGGAGG <b>AGG</b> AAGTACA<br>* <u>GATCT</u> GTACTIONCTT <b>CCT</b> CTTGCTA                                                                |
| S <b>AA</b> GAAY-For (H06 NLS mut)<br>S <b>AA</b> GAAY-Rev                                                                                         | * <u>GATCT</u> AGCG <b>CAGCA</b> GAG <b>AGCAGCA</b> TACA<br>* <u>GATCT</u> GTA <b>TGCTGCTCCTGCTGCGCTA</b>                                                      |

**Table S1.** Oligonucleotide sequences used in this study. Key: Bold, underlined: restriction sites; Bold, blue: mutation introduced. \* denotes 5'-phosphorylation.
